# Supplementary material for: Precision of a Hand-Held 3D Surface Scanner in Dry and Wet Skeletal Surfaces: An Ex Vivo Study
Source: MDPI journal article supplement (doi:10.3390/diagnostics12092251), 2022-09-18
Supplement: s1 [file s1]

# Precision of a hand-held 3D surface scanner in dry and wet skeletal surfaces: an ex vivo study

Jannis Probst, Konstantinos Dritsas, Demetrios Halazonetis, Yijin Ren, Christos Katsaros, Nikolaos Gkantidis

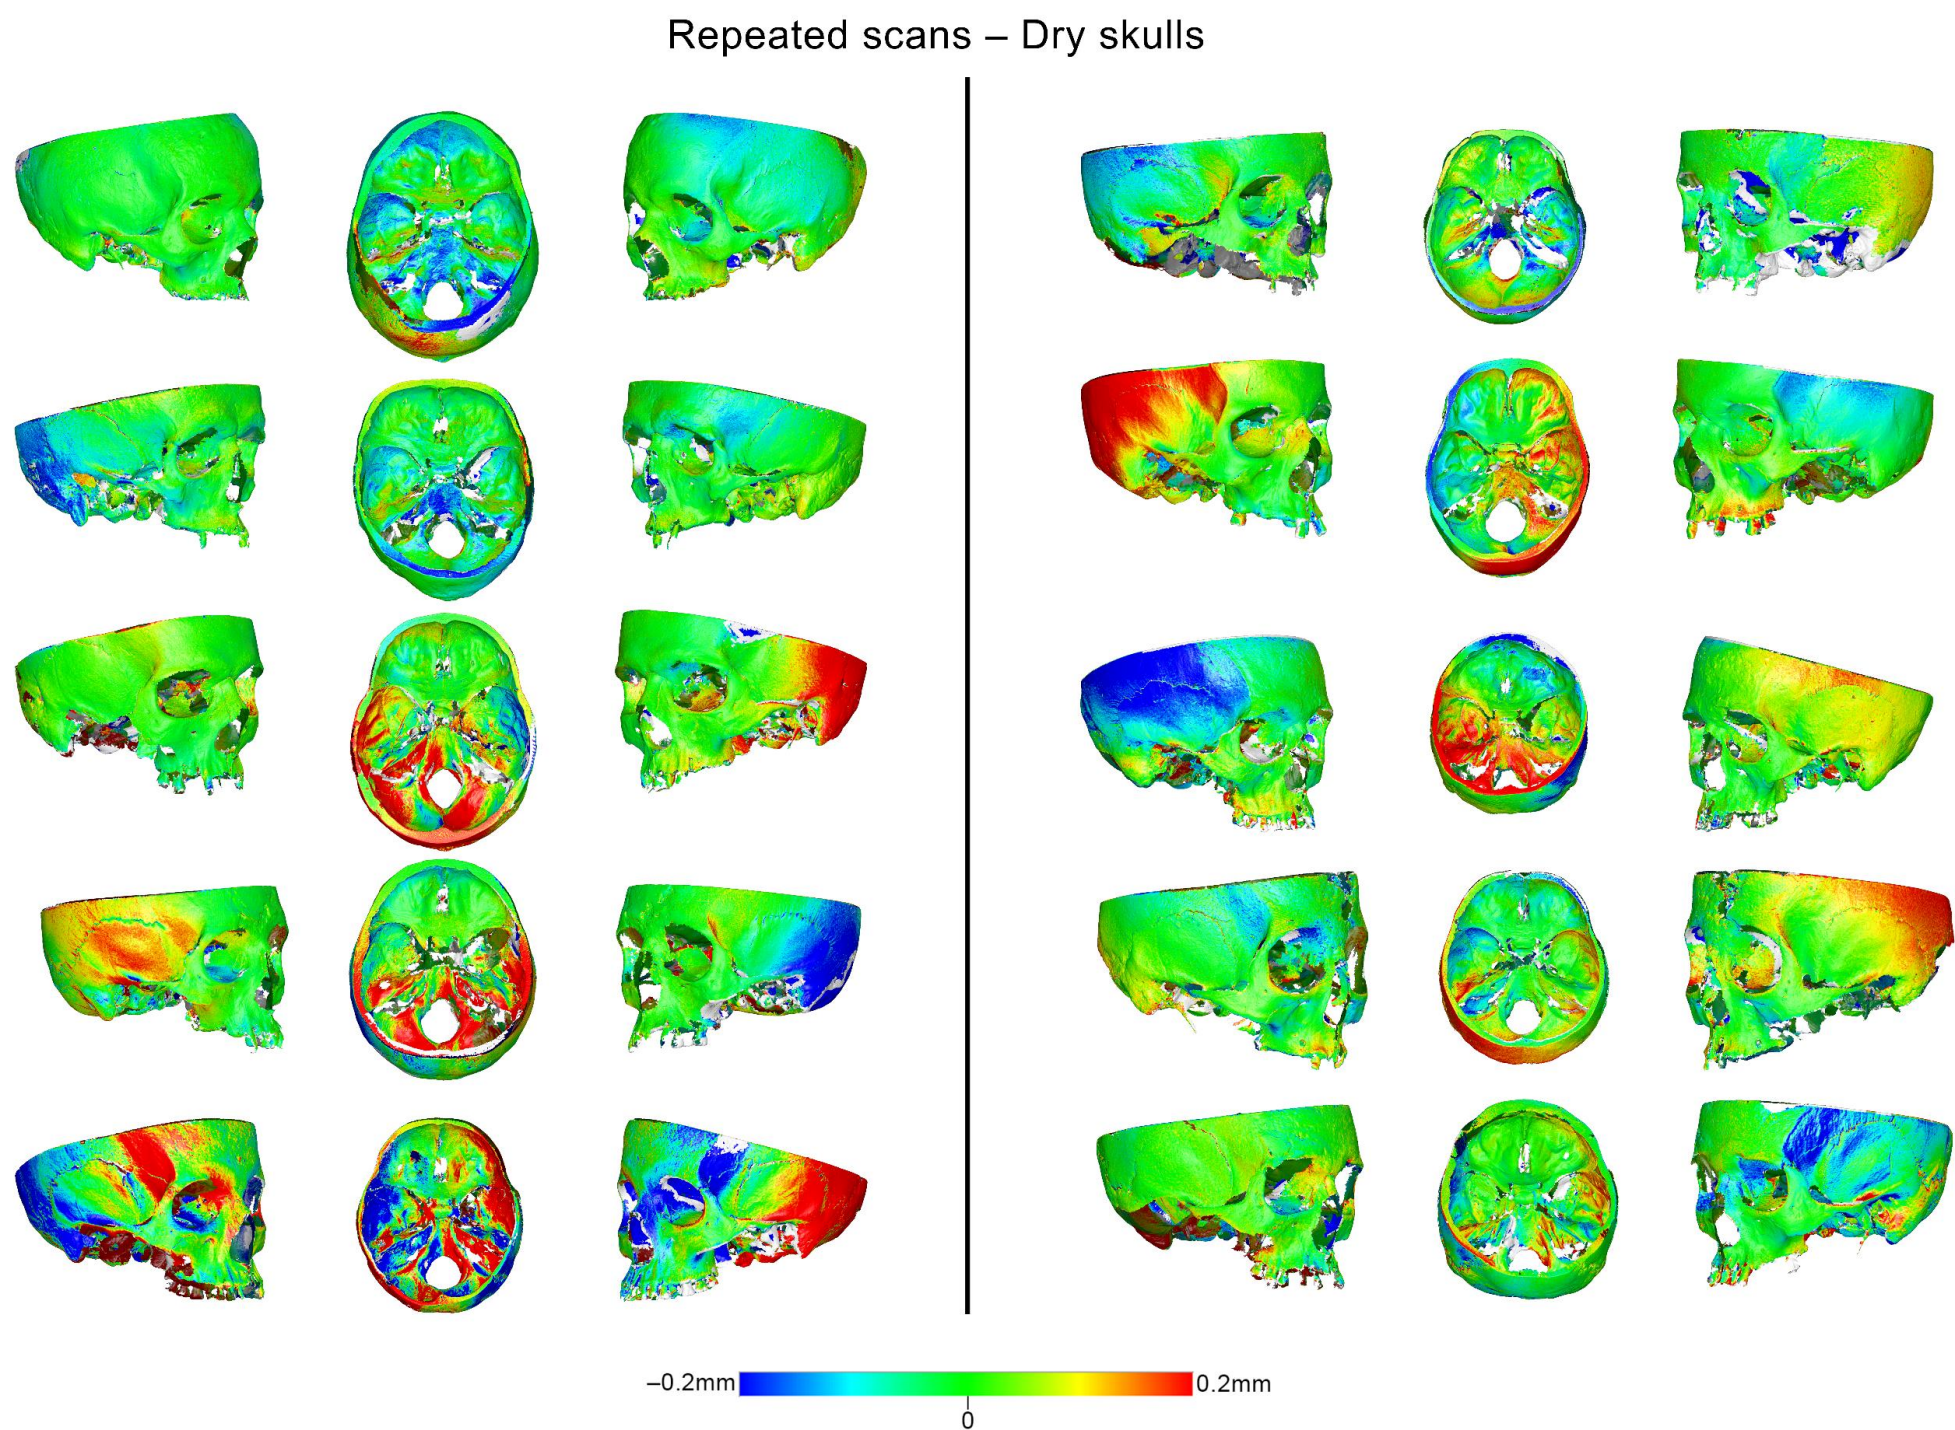

**Figure S1.** Color coded distance maps of best-fit superimpositions between repeated scans of 10 dry skulls. Three skull views in a row per side correspond to a single specimen.



Repeated scans – Dry mandibles

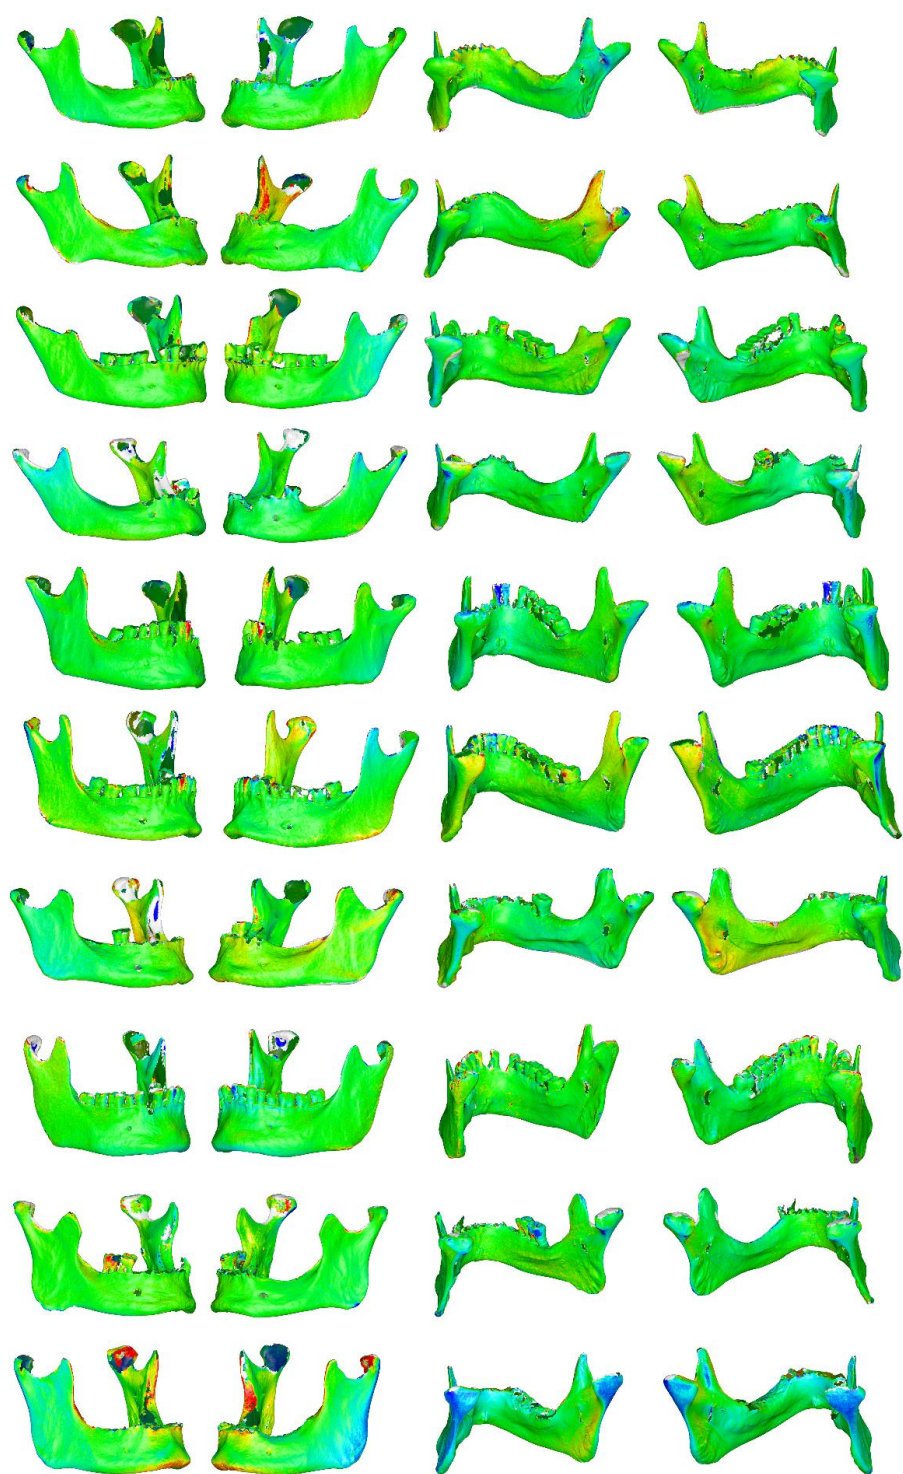

-0.2mm 0 0.2mm

Repeated scans – Wet mandibles

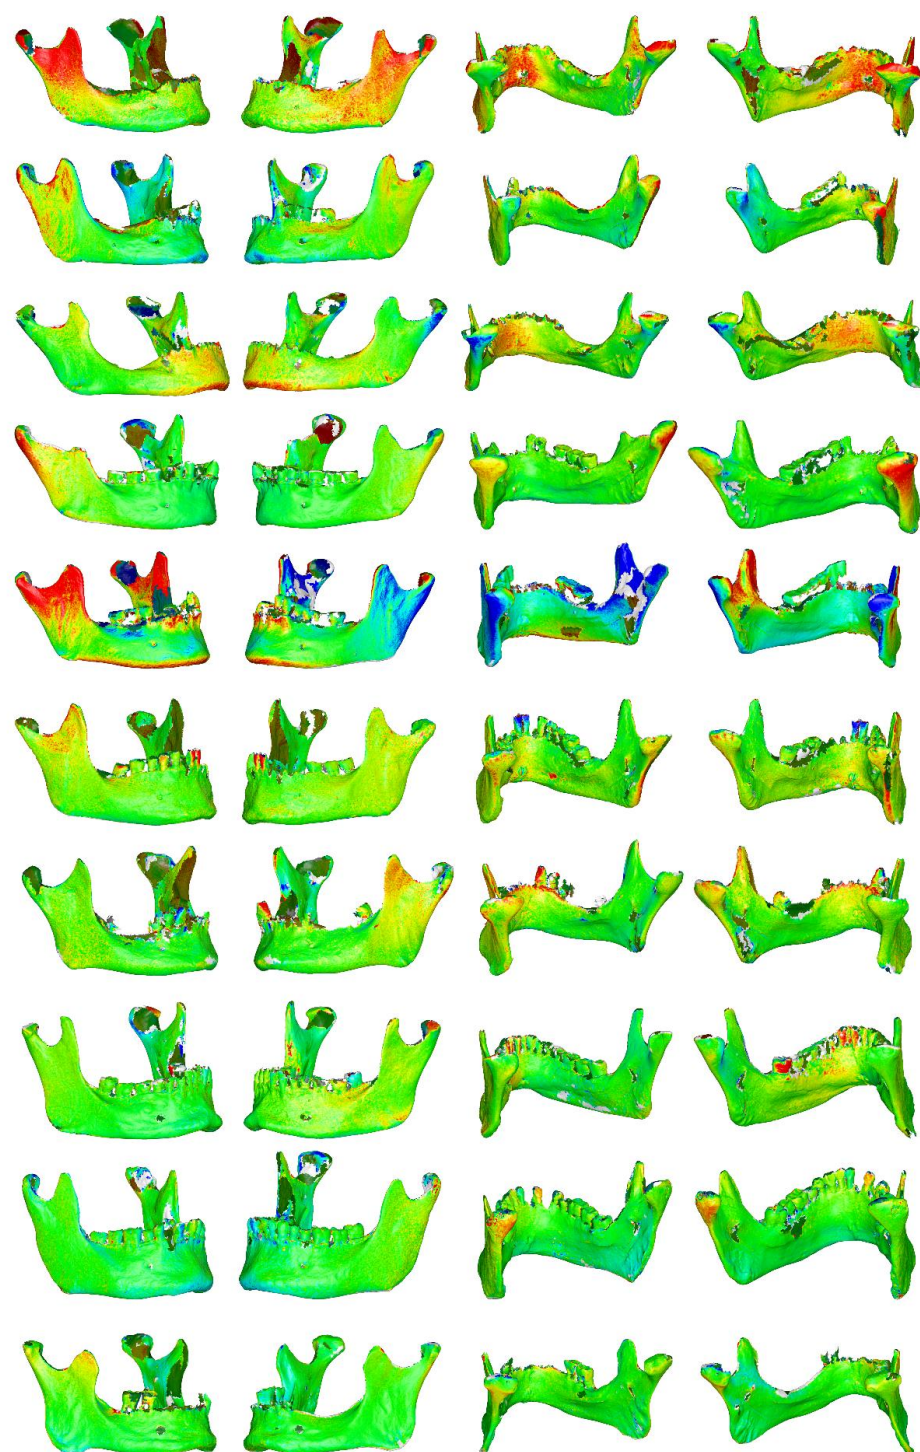

-0.2mm 0 0.2mm

**Figure S2.** Color coded distance maps of best-fit superimpositions between repeated scans of 10 dry and 10 wet mandibles. Four mandibular views in a row per side correspond to a single specimen.



### Repeated model generation (same scan) - Dry skulls

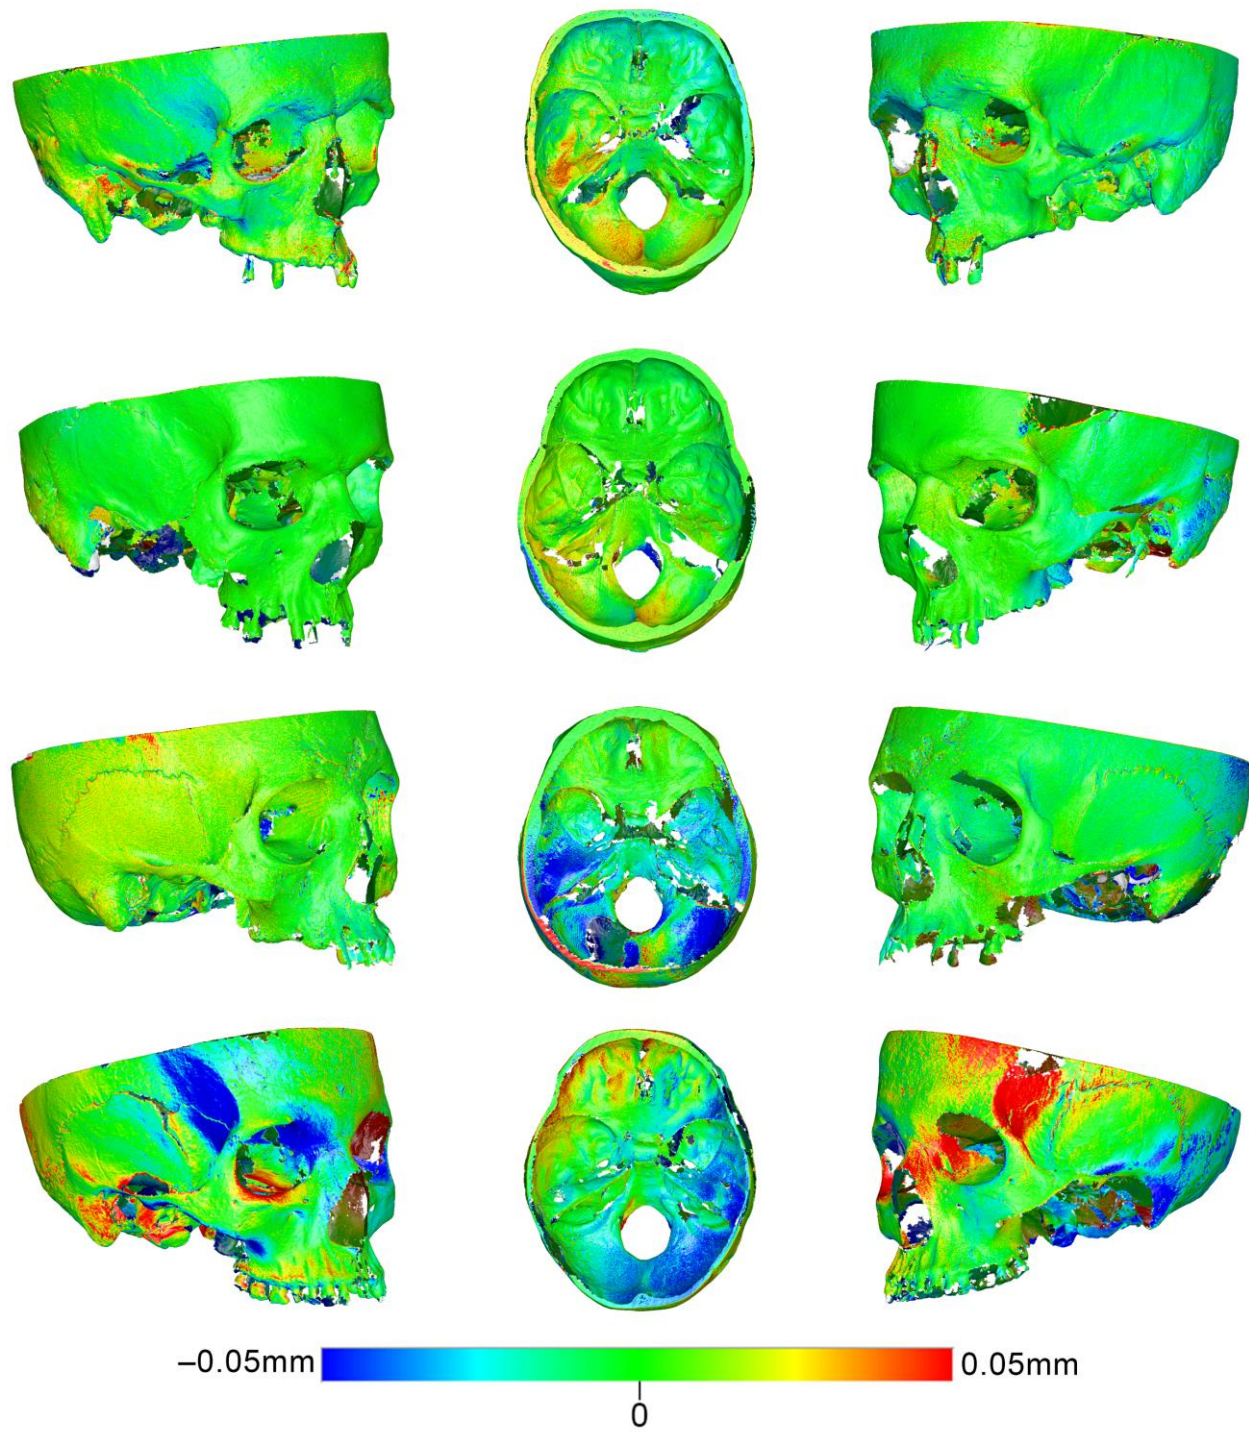

**Figure S3.** Color coded distance maps of best-fit superimpositions of repeated model generations of the same scan for 4 dry skulls. Three skull views in a row per side correspond to a single specimen.

### Repeated model generation (same scan) - Dry mandibles

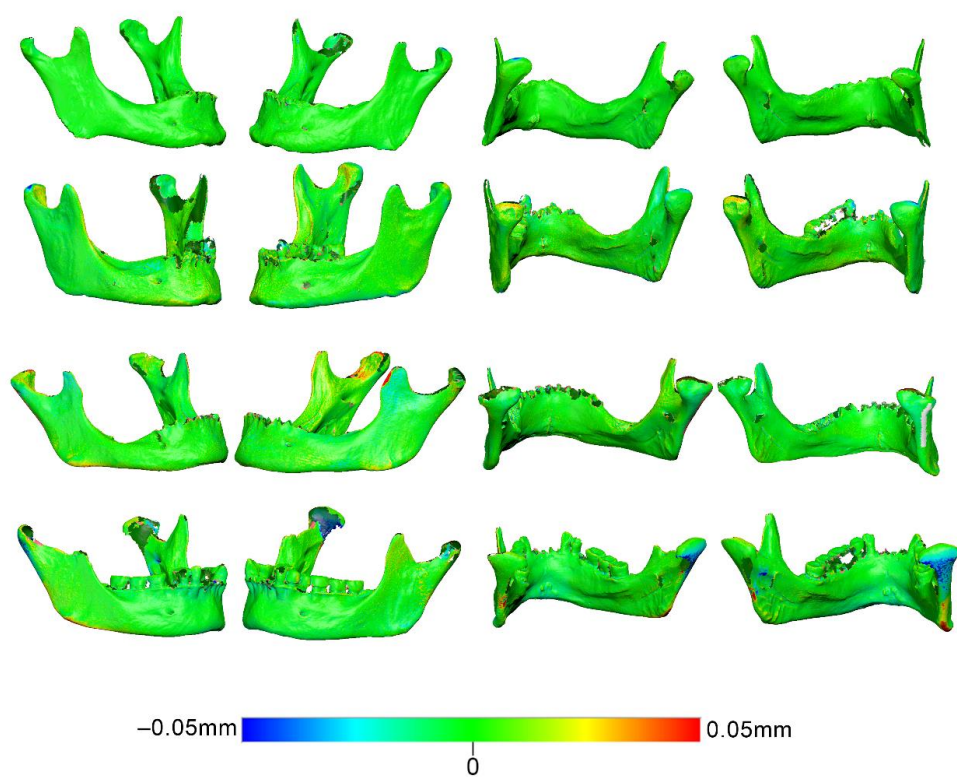

### Repeated model generation (same scan) - Wet mandibles

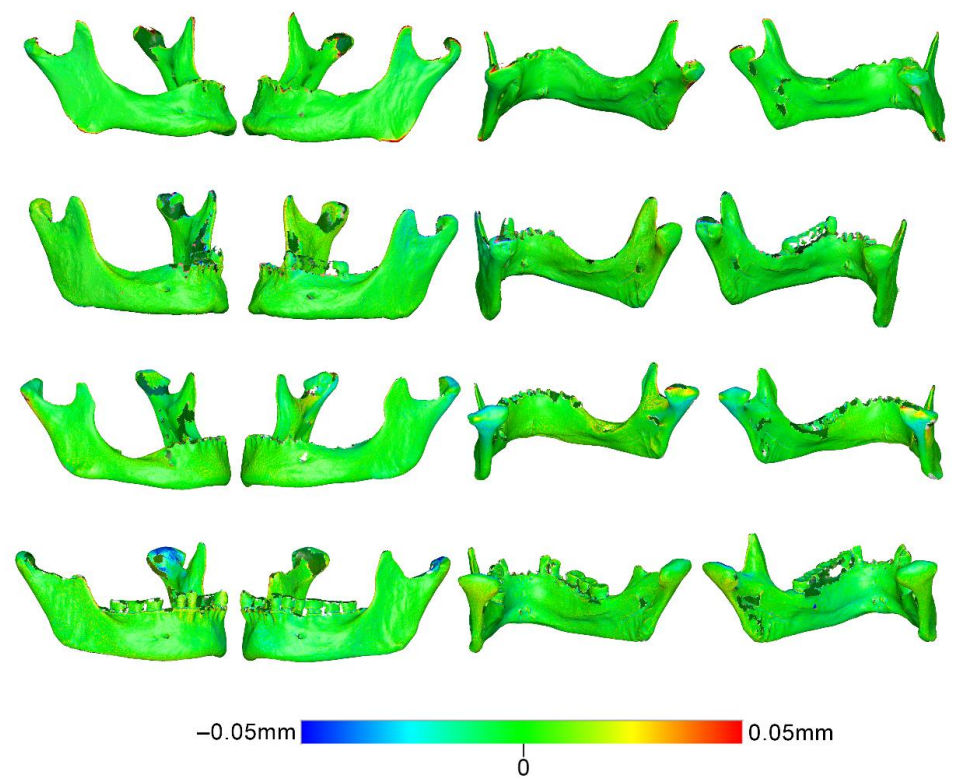

**Figure S4.** Color coded distance maps of best-fit superimpositions of repeated model generations of the same scan for 4 dry and 4 wet mandibles. Four mandibular views in a row per side correspond to a single specimen.
